# Supplementary material for: Risk Assessment of Indoor Air Quality and Its Association with Subjective Symptoms among Office Workers in Korea
Source: MDPI journal article supplement (doi:10.3390/ijerph19042446), 2022-02-20
Supplement: s1 [file s1]

Table S1. Summary of exposure factors, toxicity reference values, and distribution used in exposure scenarios for assessing the risk in offices.

| Exposure factor                             |                 | Scenario value               | Distribution            |                         |
|---------------------------------------------|-----------------|------------------------------|-------------------------|-------------------------|
| Air concentration in office inhaled air (C) |                 | Measurement value (µg/m³)    | Log-normal              |                         |
| Body weight (BW)                            |                 | 64.2±6.42 (kg)               | Normal                  |                         |
| Inhalation rate (IR)                        |                 | 14.3±1.43 (m3/day)           | Normal                  |                         |
| Exposure time (ET)                          |                 | 8.19±2.90 (hr/day)           | Normal                  |                         |
| Exposure duration (ED)                      |                 | 35 (year)                    | Uniform                 |                         |
| Exposure frequency (EF)                     |                 | 250 (day/year)               | Uniform                 |                         |
| Average time (AT)                           |                 | 70 (year = 25,550 day/year)  | Uniform                 |                         |
|                                             |                 |                              |                         |                         |
| Chemicals                                   |                 | SF (mg/kg/day) <sup>-1</sup> | RfC (mg/m³)             | RfD (mg/kg/day)         |
| Carcinogens                                 | Benzene         | 0.027                        | -                       | -                       |
|                                             | Formaldehyde    | 0.045                        | -                       | -                       |
|                                             | Acetaldehyde    | 0.0077                       | -                       | -                       |
| Non-carcinogens                             | Toluene         | -                            | 5.00                    | 1.11                    |
|                                             | Ethylbenzene    | -                            | 1.00                    | 2.22 × 10 <sup>-1</sup> |
|                                             | Xylene          | -                            | 1.00 × 10 <sup>-1</sup> | 2.23 × 10 <sup>-2</sup> |
|                                             | NO <sub>2</sub> | -                            | 12.3 × 10 <sup>-2</sup> | 0.027                   |
|                                             | O <sub>3</sub>  | -                            | 12.9 × 10 <sup>-2</sup> | 0.029                   |

Table S2. Characteristics of indoor office environments (N=31).

| Category                                       |     | Mean (S.D) / N (%) |
|------------------------------------------------|-----|--------------------|
| Number of workers                              |     | 27.94 (28.76)      |
| Working hours (hr/day)                         |     | 8.19 (2.90)        |
| Office volume (m <sup>3</sup> )                |     | 674.52 (743.82)    |
| Number of computers                            |     | 24.23 (27.09)      |
| Number of printers                             |     | 3.23 (4.86)        |
| Number of photocopiers                         |     | 4.00 (5.65)        |
| Frequency of ventilation                       |     | 1.92 (2.56)        |
| Average ventilation duration (min/unit)        |     | 27.17 (42.51)      |
| Average time spent using air purifier (hr/day) |     | 7.07 (5.28)        |
| Average time spent using ventilation (hr/day)  |     | 8.30 (7.84)        |
| Charcoal or plant pot                          | Yes | 24 (77.34)         |
|                                                | No  | 7 (22.6)           |
| Gas range                                      | Yes | 1 (2.9)            |
|                                                | No  | 30 (96.8)          |
| Ventilator                                     | Yes | 14 (45.2)          |
|                                                | No  | 17 (54.8)          |
| Air purifier                                   | Yes | 9 (29)             |
|                                                | No  | 22 (71)            |
| HVAC                                           | Yes | 15 (48.4)          |
|                                                | No  | 16 (51.6)          |
| HVAC operational                               | Yes | 3 (9.7)            |
|                                                | No  | 12 (38.7)          |
| HVAC inspection                                | Yes | 1 (6.7)            |
|                                                | No  | 14 (93.3)          |

\* HAVC : Heating, ventilation, and air conditioning.

Table S3. Characteristics according to three categories offices.

| Category                                                                                                                                                                                                                                                                 | Group 1* (N=10)                | Group 2** (N=10)                | Group 3*** (N=11)               |
|--------------------------------------------------------------------------------------------------------------------------------------------------------------------------------------------------------------------------------------------------------------------------|--------------------------------|---------------------------------|---------------------------------|
|                                                                                                                                                                                                                                                                          | Mean (SD) and range (min-max)  |                                 |                                 |
| Number of workers                                                                                                                                                                                                                                                        | 28.80 (19.83), 7.00-65.00      | 23.70 (21.01), 4.00-70.00       | 31.00 (41.25), 3.00-150.00      |
| Floor area (m <sup>2</sup> )                                                                                                                                                                                                                                             | 190.01 (137.76), 28.53-510.40  | 236.54 (126.55), 66.06-394.02)  | 339.91 (445.17), 27.69-1614.17  |
| Office volume (m <sup>3</sup> )                                                                                                                                                                                                                                          | 502.61 (379.05), 69.82-1398.50 | 604.17 (327.76), 155.86-1063.02 | 894.77 (1160.16), 98.84-4196.32 |
| Distance of car street (m)                                                                                                                                                                                                                                               | 62.60 (93.21), 0.00-300.00     | 161.50 (147.61), 5.00-500.00    | 417.00 (351.82), 1000.00-20.00  |
| *Group 1 (general office in metropolitan city): university, bank, broadcasting station, insurance company, business building, bus company, hospital, governmental institution                                                                                            |                                |                                 |                                 |
| **Group 2 (general office in Ulsan): governmental institution, business building, hospital                                                                                                                                                                               |                                |                                 |                                 |
| ***Group 3 (detached office from factory within company site boundary): company manufacturing display machine, automobile and machine equipment, printing paper, household items, automobile interior material, automobile engine, building material, industrial rubber. |                                |                                 |                                 |

Table S4. General environment characteristics for three office groups

| Category                                             |                                                        | Construction<br>year | Volume<br>(m <sup>3</sup> ) | Floor area<br>(m <sup>2</sup> ) | Workers<br>(n) | Computer<br>(n) | Photocopier<br>(n) | Windows<br>(n) | Distance from<br>car street (m) | Existence<br>of HVAC |
|------------------------------------------------------|--------------------------------------------------------|----------------------|-----------------------------|---------------------------------|----------------|-----------------|--------------------|----------------|---------------------------------|----------------------|
| Group 1                                              | University (1)                                         | 2004                 | 344.84                      | 132.63                          | 7              | 8               | 2                  | 0              | 100                             | No                   |
|                                                      | University (2)                                         | 2002                 | 222.10                      | 88.17                           | 12             | 12              | 3                  | 4              | 100                             | Yes                  |
|                                                      | Bank                                                   | 1985                 | 766.14                      | 310.18                          | 36             | 35              | 2                  | 19             | 5                               | Yes                  |
|                                                      | Broadcasting station                                   | 1994                 | 1398.50                     | 510.40                          | 40             | 19              | 3                  | 9              | 5                               | No                   |
|                                                      | Insurance company                                      | 2010                 | 679.12                      | 227.65                          | 50             | 58              | 1                  | 20             | 5                               | No                   |
|                                                      | Business building                                      | 2016                 | 215.08                      | 82.38                           | 8              | 8               | 1                  | 8              | 30                              | No                   |
|                                                      | Bus company                                            | 2000                 | 69.82                       | 28.53                           | 65             | 1               | 1                  | 2              | 80                              | No                   |
|                                                      | Hospital (1)                                           | 2005                 | 488.62                      | 182.32                          | 21             | 23              | 18                 | 0              | -                               | Yes                  |
|                                                      | Hospital (2)                                           | 1950                 | 383.61                      | 164.92                          | 37             | 34              | 18                 | 20             | 1                               | No                   |
| Governmental institution                             | 2011                                                   | 458.24               | 172.92                      | 12                              | 12             | 1               | 19                 | 300            | Yes                             |                      |
| Group 2                                              | Governmental institution (1)                           | 2012                 | 904.06                      | 335.09                          | 28             | 28              | 15                 | 21             | 200                             | No                   |
|                                                      | Governmental institution (2)                           | 2016                 | 336.79                      | 122.03                          | 4              | 4               | 1                  | 16             | 10                              | No                   |
|                                                      | Governmental institution (3)                           | 2014                 | 563.68                      | 195.25                          | 20             | 19              | 5                  | 14             | 200                             | Yes                  |
|                                                      | Governmental institution (4)                           | 2005                 | 175.33                      | 66.06                           | 6              | 6               | 1                  | 8              | 20                              | Yes                  |
|                                                      | Governmental institution (5)                           | 2009                 | 474.09                      | 140.01                          | 11             | 13              | 1                  | 1              | 500                             | No                   |
|                                                      | Governmental institution (6)                           | 2014                 | 628.38                      | 242.62                          | 21             | 21              | 3                  | 11             | 200                             | Yes                  |
|                                                      | Business building (1)                                  | 2016                 | 1063.02                     | 386.01                          | 49             | 49              | 5                  | 34             | 200                             | Yes                  |
|                                                      | Business building (2)                                  | 2016                 | 713.28                      | 111.80                          | 7              | 15              | 0                  | 0              | 200                             | Yes                  |
|                                                      | Business building (3)                                  | 2013                 | 1027.20                     | 394.02                          | 70             | 31              | 2                  | 101            | 80                              | Yes                  |
| Hospital                                             | 1999                                                   | 155.86               | 372.51                      | 21                              | 22             | 2               | 18                 | 5              | Yes                             |                      |
| Group 3                                              | Company manufacturing display machine                  | 2004                 | 4196.32                     | 1614.17                         | 150            | 150             | 2                  | 14             | 20                              | Yes                  |
|                                                      | Company manufacturing automobile and machine equipment | 2016                 | 447.53                      | 157.60                          | 15             | 8               | 1                  | 24             | 100                             | No                   |
|                                                      | Company manufacturing printing paper                   | 2016                 | 1214.15                     | 446.38                          | 42             | 38              | 3                  | 8              | 700                             | No                   |
|                                                      | Company manufacturing household items (1)              | 1975                 | 1317.11                     | 474.00                          | 36             | 36              | 2                  | 6              | 1000                            | No                   |
|                                                      | Company manufacturing household items (2)              | 1995                 | 229.47                      | 86.95                           | 6              | 6               | 3                  | 5              | 400                             | Yes                  |
|                                                      | Company manufacturing automobile interior material     | 1985                 | 607.06                      | 252.85                          | 9              | 9               | 1                  | 10             | 50                              | No                   |
|                                                      | Company manufacturing automobile engine (1)            | 1981                 | 414.64                      | 162.22                          | 19             | 19              | 1                  | 14             | -                               | No                   |
|                                                      | Company manufacturing automobile engine (2)            | 1977                 | 415.76                      | 153.42                          | 19             | 19              | 3                  | 19             | 900                             | Yes                  |
|                                                      | Company manufacturing building material                | 2004                 | 98.84                       | 27.69                           | 3              | 1               | 1                  | 6              | 300                             | No                   |
|                                                      | Company manufacturing industrial rubber                | 1995                 | 269.32                      | 110.92                          | 15             | 20              | 21                 | 4              | 200                             | Yes                  |
| Company manufacturing building and interior material | 2000                                                   | 632.24               | 252.79                      | 27                              | 27             | 1               | 11                 | 500            | No                              |                      |

Table S5. Air pollutant concentrations measured in indoor and outdoor office environments.

|                                   | Location | N  | Detection rate (%) | M±SD          | GM     | 50%    | 95%     | I/O  |
|-----------------------------------|----------|----|--------------------|---------------|--------|--------|---------|------|
| Temperature (°C)                  | Indoor   | 31 | 100                | 26.74±2.38    | 26.64  | 26.30  | 32.02   | 0.94 |
|                                   | Outdoor  | 31 | 100                | 28.58±3.55    | 28.38  | 28.10  | 36.18   |      |
| Humidity (%)                      | Indoor   | 31 | 100                | 56.94±11.51   | 55.69  | 58.8   | 77.02   | 0.86 |
|                                   | Outdoor  | 31 | 100                | 66.26±11.06   | 65.33  | 67.9   | 87.66   |      |
| CO (ppm)                          | Indoor   | 13 | 41.94              | 0.35±0.43     | 0.16   | 0.17   | N/D     | 0.90 |
|                                   | Outdoor  | 13 | 41.94              | 0.39±0.41     | 0.17   | 0.23   | N/D     |      |
| CO <sub>2</sub> (ppm)             | Indoor   | 31 | 100                | 757.84±303.82 | 709.52 | 728.67 | 1518.33 | 1.73 |
|                                   | Outdoor  | 31 | 100                | 439.03±68.94  | 434.03 | 422.83 | 590.67  |      |
| O <sub>3</sub> (ppm)              | Indoor   | 22 | 70.97              | 0.03±0.01     | 0.02   | 0.03   | 0.05    | 0.75 |
|                                   | Outdoor  | 31 | 100                | 0.04±0.02     | 0.03   | 0.03   | 0.08    |      |
| NO <sub>2</sub> (ppm)             | Indoor   | 25 | 80.65              | 0.03±0.01     | 0.02   | 0.02   | 0.06    | 1.00 |
|                                   | Outdoor  | 25 | 80.65              | 0.03±0.02     | 0.03   | 0.03   | 0.08    |      |
| HCHO (µg/m <sup>3</sup> )         | Indoor   | 31 | 100                | 40.93±49.26   | 20.73  | 32.23  | 176.00  | 6.24 |
|                                   | Outdoor  | 31 | 100                | 6.56±3.36     | 5.31   | 7.19   | 11.51   |      |
| TVOCs (µg/m <sup>3</sup> )        | Indoor   | 31 | 100                | 358.07±280.52 | 274.29 | 235.83 | 1066.58 | 1.91 |
|                                   | Outdoor  | 31 | 100                | 187.47±105.96 | 156.89 | 165.11 | 410.32  |      |
| Benzene (µg/m <sup>3</sup> )      | Indoor   | 31 | 100                | 4.13±3.91     | 2.92   | 1.99   | 12.50   | 1.51 |
|                                   | Outdoor  | 31 | 100                | 2.73±3.19     | 1.90   | 1.49   | 8.01    |      |
| Toluene (µg/m <sup>3</sup> )      | Indoor   | 31 | 100                | 121.33±125.36 | 87.00  | 83.98  | 265.30  | 1.84 |
|                                   | Outdoor  | 31 | 100                | 66.02±55.54   | 39.32  | 46.40  | 135.87  |      |
| Ethylbenzene (µg/m <sup>3</sup> ) | Indoor   | 31 | 100                | 13.52±9.40    | 10.29  | 13.09  | 26.36   | 1.36 |
|                                   | Outdoor  | 31 | 100                | 9.95±9.34     | 6.62   | 6.83   | 31.05   |      |
| m,p-Xylene (µg/m <sup>3</sup> )   | Indoor   | 31 | 100                | 9.15±5.86     | 7.34   | 9.14   | 19.94   | 1.16 |
|                                   | Outdoor  | 31 | 100                | 7.88±6.28     | 6.62   | 6.12   | 18.72   |      |
| o-Xylene (µg/m <sup>3</sup> )     | Indoor   | 31 | 100                | 6.32±4.02     | 5.08   | 6.43   | 13.19   | 1.16 |
|                                   | Outdoor  | 31 | 100                | 5.44±4.06     | 4.04   | 4.90   | 12.39   |      |
| Acetaldehyde (µg/m <sup>3</sup> ) | Indoor   | 31 | 100                | 13.62±10.64   | 9.83   | 11.56  | 31.40   | 2.70 |
|                                   | Outdoor  | 31 | 100                | 5.05±2.38     | 4.26   | 5.31   | 8.59    |      |

Table S6. Air pollutants concentration according to three classifications

| Pollutant                               | Category | Indoor |                     |         | Outdoor |                     |         |
|-----------------------------------------|----------|--------|---------------------|---------|---------|---------------------|---------|
|                                         |          | N      | M $\pm$ SD          | p-value | N       | M $\pm$ SD          | p-value |
| Temperature ( $^{\circ}$ C)             | Group 1  | 10     | 26.29 $\pm$ 2.25    | 0.43    | 10      | 28.31 $\pm$ 2.34    | 0.22    |
|                                         | Group 2  | 10     | 26.67 $\pm$ 2.97    |         | 10      | 30.19 $\pm$ 4.51    |         |
|                                         | Group 3  | 11     | 25.95 $\pm$ 1.71    |         | 11      | 27.36 $\pm$ 3.22    |         |
| Humidity (%)                            | Group 1  | 10     | 60.83 $\pm$ 5.31    | 0.54    | 10      | 71.30 $\pm$ 8.05    | 0.12    |
|                                         | Group 2  | 10     | 55.14 $\pm$ 13.49   |         | 10      | 66.74 $\pm$ 12.74   |         |
|                                         | Group 3  | 11     | 55.03 $\pm$ 13.65   |         | 11      | 61.25 $\pm$ 10.48   |         |
| CO <sub>2</sub> (ppm)                   | Group 1  | 10     | 778.62 $\pm$ 218.43 | 0.10    | 10      | 470.87 $\pm$ 70.18  | 0.13    |
|                                         | Group 2  | 10     | 883.28 $\pm$ 413.17 |         | 10      | 427.72 $\pm$ 67.81  |         |
|                                         | Group 3  | 11     | 624.92 $\pm$ 211.51 |         | 11      | 420.38 $\pm$ 64.52  |         |
| O <sub>3</sub> (ppm)                    | Group 1  | 9      | 0.03 $\pm$ 0.02     | 0.75    | 10      | 0.04 $\pm$ 0.03     | 0.45    |
|                                         | Group 2  | 7      | 0.03 $\pm$ 0.01     |         | 10      | 0.04 $\pm$ 0.02     |         |
|                                         | Group 3  | 9      | 0.03 $\pm$ 0.01     |         | 9       | 0.03 $\pm$ 0.02     |         |
| NO <sub>2</sub> (ppm)                   | Group 1  | 9      | 0.03 $\pm$ 0.01     | 0.26    | 9       | 0.03 $\pm$ 0.02     | 0.63    |
|                                         | Group 2  | 7      | 0.02 $\pm$ 0.02     |         | 7       | 0.03 $\pm$ 0.02     |         |
|                                         | Group 3  | 9      | 0.03 $\pm$ 0.01     |         | 9       | 0.03 $\pm$ 0.02     |         |
| HCHO ( $\mu$ g/m <sup>3</sup> )         | Group 1  | 10     | 32.12 $\pm$ 20.83   | 0.13    | 10      | 7.62 $\pm$ 2.66     | 0.43    |
|                                         | Group 2  | 10     | 69.06 $\pm$ 76.34   |         | 10      | 6.41 $\pm$ 3.77     |         |
|                                         | Group 3  | 11     | 23.37 $\pm$ 20.93   |         | 11      | 5.71 $\pm$ 3.55     |         |
| TVOCs ( $\mu$ g/m <sup>3</sup> )        | Group 1  | 10     | 364.20 $\pm$ 266.04 | 0.46    | 10      | 169.11 $\pm$ 100.31 | 0.55    |
|                                         | Group 2  | 10     | 334.93 $\pm$ 144.34 |         | 10      | 226.44 $\pm$ 121.91 |         |
|                                         | Group 3  | 11     | 373.54 $\pm$ 390.89 |         | 11      | 168.75 $\pm$ 94.93  |         |
| Benzene ( $\mu$ g/m <sup>3</sup> )      | Group 1  | 10     | 4.48 $\pm$ 4.31     | 0.048   | 10      | 3.16 $\pm$ 4.50     | 0.65    |
|                                         | Group 2  | 10     | 5.85 $\pm$ 3.72     |         | 10      | 3.39 $\pm$ 3.33     |         |
|                                         | Group 3  | 11     | 2.82 $\pm$ 4.03     |         | 10      | 2.36 $\pm$ 2.44     |         |
| Toluene ( $\mu$ g/m <sup>3</sup> )      | Group 1  | 10     | 146.37 $\pm$ 88.48  | 0.13    | 10      | 39.41 $\pm$ 43.03   | 0.14    |
|                                         | Group 2  | 10     | 108.11 $\pm$ 63.32  |         | 10      | 87.13 $\pm$ 69.38   |         |
|                                         | Group 3  | 10     | 125.44 $\pm$ 193.67 |         | 10      | 56.25 $\pm$ 42.21   |         |
| Ethylbenzene ( $\mu$ g/m <sup>3</sup> ) | Group 1  | 10     | 16.20 $\pm$ 8.34    | 0.057   | 10      | 8.51 $\pm$ 7.67     | 0.73    |
|                                         | Group 2  | 10     | 15.92 $\pm$ 7.53    |         | 10      | 12.00 $\pm$ 9.82    |         |
|                                         | Group 3  | 10     | 9.86 $\pm$ 11.58    |         | 10      | 10.23 $\pm$ 10.85   |         |
| m,p-Xylene ( $\mu$ g/m <sup>3</sup> )   | Group 1  | 10     | 10.75 $\pm$ 6.14    | 0.14    | 10      | 7.48 $\pm$ 6.44     | 0.53    |
|                                         | Group 2  | 10     | 10.70 $\pm$ 5.34    |         | 10      | 10.21 $\pm$ 7.45    |         |
|                                         | Group 3  | 10     | 7.11 $\pm$ 6.53     |         | 10      | 6.87 $\pm$ 5.39     |         |
| o-Xylene ( $\mu$ g/m <sup>3</sup> )     | Group 1  | 10     | 6.67 $\pm$ 4.54     | 0.26    | 10      | 5.31 $\pm$ 4.23     | 0.62    |
|                                         | Group 2  | 10     | 7.58 $\pm$ 3.34     |         | 10      | 6.68 $\pm$ 4.66     |         |
|                                         | Group 3  | 10     | 5.36 $\pm$ 4.53     |         | 10      | 4.89 $\pm$ 3.67     |         |
| Acetaldehyde ( $\mu$ g/m <sup>3</sup> ) | Group 1  | 10     | 10.36 $\pm$ 5.53    | 0.06    | 10      | 6.30 $\pm$ 2.19     | 0.11    |
|                                         | Group 2  | 10     | 21.89 $\pm$ 14.01   |         | 10      | 4.33 $\pm$ 2.02     |         |
|                                         | Group 3  | 10     | 8.97 $\pm$ 6.10     |         | 10      | 4.96 $\pm$ 2.37     |         |

Table S7. Correlation among indoor air pollutant concentrations measured in office buildings (shaded areas represent outdoor concentrations).

|      | (1)         | (2)         | (3)         | (4)   | (5)         | (6)         | (7)         | (8)         | (9)   | (10)        | (11)        | (12)        | (13)        | (14)        |
|------|-------------|-------------|-------------|-------|-------------|-------------|-------------|-------------|-------|-------------|-------------|-------------|-------------|-------------|
| (1)  | 1           | .027        | -.539       | .075  | .221        | -.174       | .489**      | .420*       | .046  | .000        | -.031       | .013        | .024        | -.024       |
|      | .014        | .884        | .057        | .688  | .239        | .405        | <b>.005</b> | <b>.019</b> | .806  | .999        | .870        | .944        | .896        | .898        |
| (2)  | -.436*      | 1           | .676*       | .165  | -.097       | .215        | -.131       | .231        | -.189 | .100        | .147        | .027        | -.045       | -.090       |
|      | <b>.052</b> | .059        | <b>.011</b> | .376  | .611        | .303        | .483        | .211        | .308  | .593        | .430        | .886        | .810        | .629        |
| (3)  | -.205       | .202        | 1           | .405  | -.420       | .330        | -.449       | -.122       | .199  | .011        | -.153       | .053        | .082        | .064        |
|      | .417        | .402        | .488        | .170  | .153        | .294        | .124        | .692        | .514  | .971        | .618        | .864        | .791        | .834        |
| (4)  | .151        | -.156       | .211        | 1     | .414*       | .100        | -.103       | -.499**     | -.297 | -.101       | -.049       | -.102       | -.089       | -.128       |
|      | .526        | .391        | .205        | .612  | <b>.023</b> | .635        | .581        | <b>.004</b> | .105  | .590        | .794        | .587        | .634        | .491        |
| (5)  | .147        | -.197       | -.052       | .118  | 1           | -.519**     | .126        | -.128       | -.100 | .077        | -.015       | .043        | -.029       | -.069       |
|      | .526        | .391        | .205        | .612  |             | <b>.009</b> | .507        | .499        | .600  | .687        | .938        | .822        | .880        | .718        |
| (6)  | -.233       | .399*       | .562        | -.147 | -.595*      | 1           | -.099       | .078        | -.105 | -.109       | -.122       | -.092       | .057        | .093        |
|      | .263        | <b>.048</b> | .057        | .484  | <b>.019</b> |             | .639        | .709        | .616  | .603        | .560        | .662        | .787        | .658        |
| (7)  | .196        | -.110       | -.261       | .290  | .375        | -.298       | 1           | .157        | -.164 | .103        | .033        | .274        | .197        | .170        |
|      | .292        | .556        | .388        | .113  | .093        | .148        |             | .398        | .377  | .580        | .859        | .137        | .289        | .361        |
| (8)  | .098        | .282        | .066        | .055  | -.091       | -.294       | -.107       | 1           | .042  | .135        | .070        | -.112       | -.055       | -.043       |
|      | .600        | .125        | .830        | .770  | .696        | .153        | .568        |             | .821  | .468        | .708        | .548        | .771        | .820        |
| (9)  | .120        | .220        | .244        | -.021 | -.072       | .033        | -.010       | .134        | 1     | .091        | .005        | .054        | .042        | .074        |
|      | .522        | .235        | .422        | .912  | .756        | .875        | .959        | .472        |       | .626        | .980        | .773        | .821        | .692        |
| (10) | .270        | .277        | -.480       | .053  | .147        | -.327       | .121        | .287        | .067  | 1           | .169        | .461**      | .332        | .339        |
|      | .141        | .132        | .097        | .777  | .524        | .111        | .517        | .118        | .721  |             | .363        | <b>.009</b> | .068        | .062        |
| (11) | .065        | .112        | .090        | .328  | .260        | .004        | -.027       | .214        | -.161 | .409*       | 1           | .513**      | .534**      | .500**      |
|      | .730        | .550        | .770        | .072  | .254        | .984        | .885        | .248        | .388  | <b>.022</b> |             | <b>.003</b> | <b>.002</b> | <b>.004</b> |
| (12) | .104        | .138        | -.010       | .219  | .147        | -.283       | .148        | .284        | .177  | .617**      | .686**      | 1           | .937**      | .915**      |
|      | .576        | .460        | .974        | .237  | .526        | .170        | .427        | .122        | .340  | <b>.000</b> | <b>.000</b> |             | <b>.000</b> | <b>.000</b> |
| (13) | .089        | .090        | -.126       | .122  | .106        | -.277       | .176        | .217        | .179  | .586**      | .625**      | .970**      | 1           | .991**      |
|      | .633        | .629        | .681        | .512  | .648        | .181        | .344        | .241        | .337  | <b>.001</b> | <b>.000</b> | <b>.000</b> |             | <b>.000</b> |
| (14) | .095        | .105        | -.104       | .214  | -.027       | -.257       | .240        | .169        | .113  | .568**      | .551**      | .835**      | .849**      | 1           |
|      | .611        | .573        | .735        | .248  | .907        | .214        | .193        | .364        | .544  | <b>.001</b> | <b>.001</b> | <b>.000</b> | <b>.000</b> |             |

(1) Temperature (2) Humidity (3) CO (4) CO<sub>2</sub> (5) O<sub>3</sub> (6) NO<sub>2</sub> (7) TVOCs (8) HCHO (9) Acetaldehyde (10) Benzene (11) Toluene  
(12) Ethylbenzene (13) m,p-Xylene (14) o-Xylene

\*Correlation is significant at the 0.01 level

\*\*Correlation is significant at the 0.05 level
